# Supplementary material
Source: PubMed Central journal article supplement (PMC2741027)

Fig. S3 (Xie et al.)

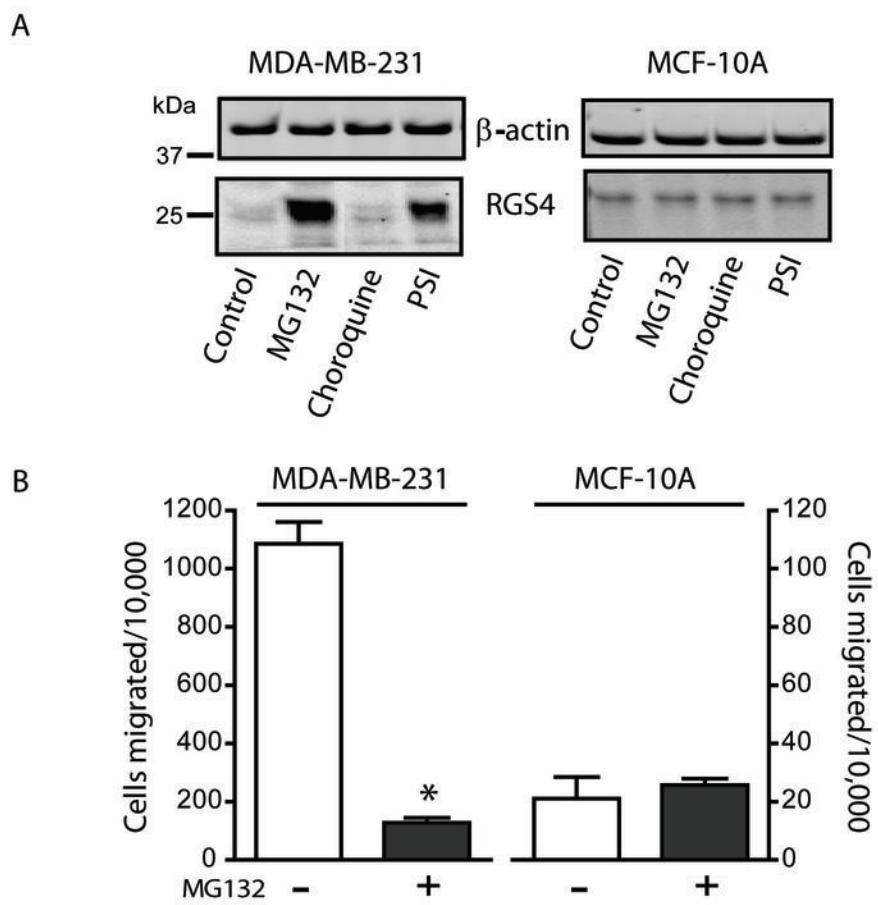

Supplement: NIHMS133662-supplement-Sup-3.pdf [file NIHMS133662-supplement-Sup-3.pdf]
